# Supplementary material for: mir-34b/c and mir-449a/b/c are required for spermatogenesis, but not for the first cleavage division in mice
Source: Oxford University Press journal article supplement (doi:10.1242/bio.201410959), 2015-01-23
Supplement: bio_201410959-s1.pdf [file bio_201410959-s1.pdf]

## Supplementary Material

Shuiqiao Yuan et al. doi: 10.1242/bio.201410959

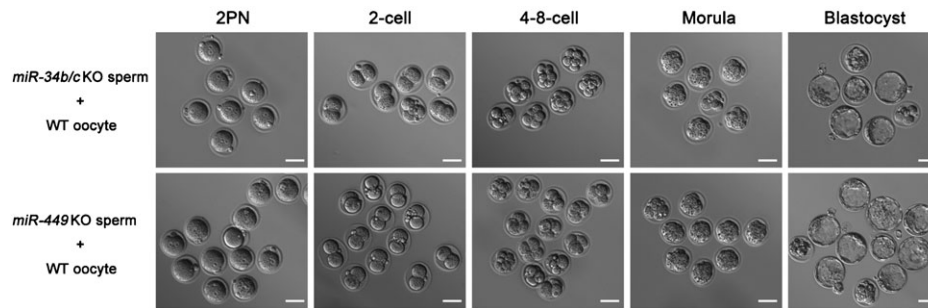

**Fig. S1. Morphology of embryos at 2-pronucleus (PN), 2-cell, 4–8-cell, morula and blastocyst stages of development.** Sperm and oocyte genotypes are labeled to the left. Scale bars = 100  $\mu\text{m}$ .

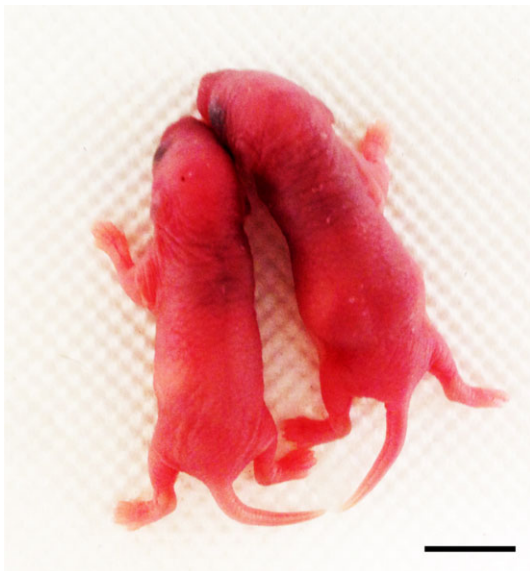

**Fig. S2. Pups born through ROSI using WT oocytes and *miR-34b/c* and *miR-449* double knockout round spermatids.** Scale bar = 1 cm.

**Table S1. Fertility of *miR-34b/c* KO, *miR-449* KO and miR-dKO mice**

| Male genotype       | Female genotype     | No. of litters | No. of pups | Average of litter size | Average of litter interval (days) |
|---------------------|---------------------|----------------|-------------|------------------------|-----------------------------------|
| WT                  | WT                  | 26             | 215         | $8.27 \pm 0.66$        | $23.04 \pm 0.12$                  |
| <i>miR-34b/c</i> KO | WT                  | 20             | 149         | $7.45 \pm 1.05$        | $24.35 \pm 0.21$                  |
| <i>miR-34b/c</i> KO | <i>miR-34b/c</i> KO | 15             | 109         | $7.26 \pm 1.33$        | $23.26 \pm 0.22$                  |
| <i>miR-449</i> KO   | WT                  | 18             | 145         | $8.06 \pm 0.78$        | $24.24 \pm 0.34$                  |
| <i>miR-449</i> KO   | <i>miR-449</i> KO   | 24             | 170         | $7.08 \pm 1.49$        | $23.82 \pm 0.83$                  |
| miR-dKO             | WT                  | 0              | 0           | 0                      | 0                                 |

**Table S2. Development of WT oocytes or *miR-34b/c* KO oocytes injected with *miR-34b/c* KO spermatozoa**

| Oocyte genotype         | Total No. of surviving oocytes (no. of exp.) | No. of oocytes with 2PN (% of Total) | No. of 2-cell (% of 2PN) | No. of 4-cell (% of 4-cell/2-cell) | No. of morula (% of 2-cell) | No. of Blastocyst (% of Blastocyst/2-cell) |
|-------------------------|----------------------------------------------|--------------------------------------|--------------------------|------------------------------------|-----------------------------|--------------------------------------------|
| WT                      | 38 (2)                                       | 31 (81.58)                           | 29 (93.55)               | 28 (96.55)                         | 26 (89.66)                  | 16 (55.17)                                 |
| <i>miR-34b/c</i> KO     | 70 (2)                                       | 59 (84.29)                           | 52 (88.13)               | 49 (94.23)                         | 43 (82.69)                  | 28 (53.85)                                 |
| Parthenogenetic control | 30 (2)                                       | 3                                    | 1                        | 0                                  | 0                           | 0                                          |

exp., experiment.

**Table S3. Development of WT oocytes or *miR-449* KO oocytes injected with *miR-449* KO spermatozoa**

| Oocyte genotype         | Total No. of surviving oocytes (no. of exp.) | No. of oocytes with 2PN (% of Total) | No. of 2-cell (% of 2PN) | No. of 4-cell (% of 4-cell/2-cell) | No. of morula (% of 2-cell) | No. of Blastocyst (% of Blastocyst/2-cell) |
|-------------------------|----------------------------------------------|--------------------------------------|--------------------------|------------------------------------|-----------------------------|--------------------------------------------|
| WT                      | 124 (3)                                      | 108 (87.10)                          | 102 (94.44)              | 95 (93.14)                         | 87 (85.29)                  | 59 (57.84)                                 |
| <i>miR-449</i> KO       | 137 (4)                                      | 116 (84.67)                          | 110 (94.83)              | 101 (91.82)                        | 91 (82.73)                  | 57 (51.82)                                 |
| Parthenogenetic control | 30 (2)                                       | 3                                    | 1                        | 0                                  | 0                           | 0                                          |

exp., experiment.

Tables S4–S6: See supplementary webpage

**Table S7. Primer sequences for qPCR validation of RNA-Seq data**

| Gene symbol  | Forward (5'→3')         | Reverse (5'→3')         |
|--------------|-------------------------|-------------------------|
| <i>Tekt3</i> | GTGCAGGGATATGGCTCAGT    | TTCACAGCCAAGTCATGCTC    |
| <i>Zpbp2</i> | TTTCCTGGAGCCGTTATCTG    | ATCAGGTTCCCGATATGCAA    |
| <i>Adam2</i> | CTTGACCACAGGCGATGCTAA   | TGATAGGTAGCGCCAACATAATC |
| <i>Tekt4</i> | GCAAGTGAAGTCCGGCTTTCTC  | TGGTCTGTGATCTCCGTCAG    |
| <i>Nphp1</i> | GATAGTTTGGTGAAGGCA      | CCCACAGGTGCAGCTTCAT     |
| <i>Tekt2</i> | TTGAAGCCACCAAGAAGGTC    | CCGGTGGTCAGAGTTGAGTT    |
| <i>Cplx1</i> | AGTTCGTGATGAAACAAGCCC   | TCTTCCTCCTTCTTAGCAGCA   |
| <i>Pebp1</i> | GAGCTGGGCAAAGTGCTAAC    | GTCTGTGAGGACCAGGGTGT    |
| <i>Adam3</i> | TTGCGTGACAAGTTGGGAACA   | GGGCTCAATCCATAAGTGATGT  |
| <i>Gamt</i>  | CACGCACCTGCAAATCCTG     | TACCGAAGCCCCTTCCAAGA    |
| <i>Sepp1</i> | AGCCATTAAGATCGCTTACTGTG | GAGGGCTCCGCAGTTTTATTG   |
| <i>Prnd</i>  | TCTCCACGGTCAAGGCAAG     | CGGTTCTCAGCTACCCGAG     |
| <i>Wipf3</i> | ACACCCCAGCTTAAGGAAG     | CCTTTTGAACCCTCGATCTG    |
| <i>Mfge8</i> | ATCTACTGCCTCTGCCCTGA    | CCAGACATTTGGCATCATTG    |
| <i>Gapdh</i> | AACTTTGGCATTGTGGAAGG    | ACACATTGGGGGTAGGAACA    |
